# Supplementary material for: TeaGVD: A comprehensive database of genomic variations for uncovering the genetic architecture of metabolic traits in tea plants
Source: Front Plant Sci. 2022 Nov 28;13:1056891. doi: 10.3389/fpls.2022.1056891 (PMC9742251; doi:10.3389/fpls.2022.1056891)
Supplement: Supplementary file 2 [file Table_2.xlsx]

## Sheet: Table S2
Table S2. The orthologous gene sets for three tea genome assemblies.
Gene ID (chromosome-level genome, Shuchazao)	Gene ID (draf genome, Shuchazao)	Gene ID (draf genome, Yunkang 10)
CSS0000003	TEA004279	CSA016130
CSS0000004	NA	CSA015214
CSS0000005	TEA028197	NA
CSS0000006	TEA007983	NA
CSS0000007	TEA008334	CSA008505
CSS0000009	NA	CSA009407
CSS0000010	TEA013886	CSA024990
CSS0000011	NA	CSA033945
CSS0000013	TEA018978	NA
CSS0000015	TEA002781	CSA031770
CSS0000016	NA	CSA026734
CSS0000017	NA	CSA000566
CSS0000018	TEA019803	CSA029677
CSS0000019	TEA007050	NA
CSS0000020	TEA006663	CSA018150
CSS0000021	TEA009530	CSA019516
CSS0000022	TEA017578	CSA004282
CSS0000023	TEA007783	NA
CSS0000024	TEA027189	NA
CSS0000026	NA	CSA029196
CSS0000027	TEA030000	CSA024974
CSS0000028	TEA013423	NA
CSS0000029	NA	CSA032940
CSS0000032	TEA018266	CSA026384
CSS0000033	TEA033481	CSA014650
CSS0000034	TEA013470	CSA033538
CSS0000036	TEA002931	NA
CSS0000037	NA	CSA020267
CSS0000038	NA	CSA005351
CSS0000040	NA	CSA017547
CSS0000046	TEA028854	CSA022305
CSS0000047	NA	CSA021804
CSS0000049	TEA007191	NA
CSS0000050	TEA015505	NA
CSS0000051	TEA004857	CSA028317
CSS0000053	TEA032052	CSA014062
CSS0000054	NA	CSA026289
CSS0000055	TEA023407	NA
CSS0000057	TEA023722	CSA009401
CSS0000059	TEA024923	NA
CSS0000062	NA	CSA019854
CSS0000063	TEA018683	CSA036763
CSS0000064	NA	CSA019380
CSS0000065	TEA026309	CSA035797
CSS0000068	TEA023381	NA
CSS0000070	TEA013095	NA
CSS0000074	NA	CSA036800
CSS0000075	TEA024894	CSA031284
CSS0000076	TEA029024	CSA002390
CSS0000080	TEA004811	CSA001366
CSS0000081	TEA000379	CSA035967
CSS0000083	TEA027166	NA
CSS0000084	TEA031234	CSA002997
CSS0000085	NA	CSA036474
CSS0000087	TEA007931	NA
CSS0000090	NA	CSA003892
CSS0000091	TEA016715	CSA009784
CSS0000092	TEA020731	CSA029520
CSS0000094	TEA005304	NA
CSS0000096	TEA009599	CSA031199
CSS0000097	TEA025745	NA
CSS0000099	TEA005845	CSA029959
CSS0000102	NA	CSA020082
CSS0000103	NA	CSA034202
CSS0000104	TEA015750	NA
CSS0000106	TEA011558	CSA009105
CSS0000107	TEA001326	CSA003139
CSS0000108	NA	CSA035554
CSS0000109	TEA012157	NA
CSS0000111	TEA015476	CSA011087
CSS0000113	TEA028263	CSA001389
CSS0000115	TEA012741	CSA017977
CSS0000116	TEA019936	NA
CSS0000117	TEA031666	CSA026025
CSS0000118	TEA031025	CSA012397
CSS0000120	NA	CSA000247
CSS0000121	TEA030845	NA
CSS0000122	TEA032315	CSA036340
CSS0000123	TEA002519	NA
CSS0000124	TEA025110	CSA030829
CSS0000127	TEA024358	CSA016455
CSS0000128	TEA022204	CSA029340
CSS0000129	TEA027261	NA
CSS0000130	NA	CSA001061
CSS0000131	NA	CSA021933
CSS0000134	TEA031652	CSA006069
CSS0000135	NA	CSA001716
CSS0000136	TEA003935	CSA005349
CSS0000137	TEA032117	CSA021497
CSS0000139	NA	CSA006946
CSS0000141	TEA004273	CSA024964
CSS0000142	NA	CSA019000
CSS0000143	TEA005642	CSA001441
CSS0000145	NA	CSA019765
CSS0000146	TEA013335	NA
CSS0000147	TEA007958	NA
CSS0000150	NA	CSA018229
CSS0000153	TEA030635	NA
CSS0000155	NA	CSA027182
CSS0000156	TEA006532	NA
CSS0000157	TEA011537	NA
CSS0000158	TEA033210	CSA026260
CSS0000159	TEA020723	CSA035299
CSS0000162	TEA012147	CSA024005
CSS0000164	TEA021188	CSA010395
CSS0000165	TEA015294	NA
CSS0000167	TEA021773	CSA017723
CSS0000168	TEA007281	CSA027577
CSS0000172	NA	CSA011081
CSS0000174	TEA022455	CSA020601
CSS0000175	TEA025367	CSA002922
CSS0000176	TEA001494	CSA005470
CSS0000178	TEA033447	NA
CSS0000179	TEA024803	CSA003426
CSS0000182	TEA029014	CSA021156
CSS0000184	TEA004482	NA
CSS0000185	TEA018297	CSA020368
CSS0000186	TEA025951	CSA003898
CSS0000189	TEA016261	NA
CSS0000191	NA	CSA026557
CSS0000192	NA	CSA027520
CSS0000193	TEA013047	CSA031630
CSS0000194	TEA033813	CSA029120
CSS0000196	TEA013929	CSA009059
CSS0000198	TEA018071	CSA024272
CSS0000199	NA	CSA017721
CSS0000200	NA	CSA025927
CSS0000201	TEA030382	NA
CSS0000202	TEA004561	CSA027228
CSS0000203	NA	CSA017401
CSS0000204	TEA004284	NA
CSS0000206	NA	CSA036023
CSS0000208	TEA012087	CSA020043
CSS0000209	TEA024206	NA
CSS0000210	TEA032127	CSA007895
CSS0000211	TEA024418	CSA027365
CSS0000212	TEA006754	CSA004479
CSS0000213	TEA031382	NA
CSS0000214	TEA033421	CSA036137
CSS0000216	NA	CSA011126
CSS0000218	NA	CSA011999
CSS0000219	TEA003791	NA
CSS0000220	TEA018834	CSA023125
CSS0000221	TEA030605	CSA009614
CSS0000223	TEA004822	CSA005369
CSS0000224	TEA012763	CSA009145
CSS0000229	TEA027980	NA
CSS0000230	TEA012978	CSA006519
CSS0000231	NA	CSA027207
CSS0000232	TEA024900	CSA035690
CSS0000233	TEA003288	CSA018183
CSS0000235	TEA027307	CSA014222
CSS0000237	TEA027844	CSA015866
CSS0000238	NA	CSA025957
CSS0000239	TEA014201	NA
CSS0000240	TEA009757	NA
CSS0000242	NA	CSA016359
CSS0000246	TEA021668	CSA024338
CSS0000247	TEA026438	CSA027176
CSS0000248	TEA014630	CSA031958
CSS0000249	TEA013144	CSA023808
CSS0000252	NA	CSA018405
CSS0000253	TEA022906	CSA011243
CSS0000255	TEA012161	CSA014821
CSS0000256	TEA026562	NA
CSS0000257	NA	CSA020448
CSS0000258	TEA006911	CSA034704
CSS0000259	TEA002187	NA
CSS0000260	NA	CSA034838
CSS0000262	NA	CSA008393
CSS0000263	NA	CSA022138
CSS0000264	TEA030439	NA
CSS0000269	TEA019890	NA
CSS0000270	TEA005594	NA
CSS0000271	NA	CSA016573
CSS0000272	NA	CSA031238
CSS0000273	TEA027610	CSA030122
CSS0000275	TEA021618	CSA035081
CSS0000277	TEA009003	CSA018286
CSS0000278	TEA002853	CSA028349
CSS0000280	TEA031987	CSA007929
CSS0000281	TEA027115	CSA019161
CSS0000283	TEA011401	CSA013694
CSS0000284	NA	CSA011782
CSS0000285	TEA014103	NA
CSS0000286	TEA029460	CSA011990
CSS0000287	TEA016203	CSA007662
CSS0000288	NA	CSA032852
CSS0000289	TEA008266	CSA024805
CSS0000293	TEA028102	NA
CSS0000294	NA	CSA013644
CSS0000295	NA	CSA015101
CSS0000296	TEA014289	NA
CSS0000297	NA	CSA005189
CSS0000298	TEA025434	CSA009973
CSS0000299	TEA015386	NA
CSS0000301	TEA003662	CSA023155
CSS0000303	TEA013867	NA
CSS0000304	TEA018908	CSA031726
CSS0000305	TEA013545	NA
CSS0000307	NA	CSA021426
CSS0000308	NA	CSA030798
CSS0000309	TEA002950	CSA017158
CSS0000310	TEA032588	CSA000125
CSS0000312	NA	CSA004492
CSS0000314	TEA019523	NA
CSS0000316	TEA032919	CSA018321
CSS0000318	TEA014380	CSA031824
CSS0000321	NA	CSA035610
CSS0000323	TEA032093	CSA005723
CSS0000327	TEA022250	CSA029525
CSS0000329	NA	CSA030776
CSS0000330	NA	CSA022183
CSS0000332	TEA032874	CSA023983
CSS0000333	NA	CSA035481
CSS0000334	NA	CSA031246
CSS0000335	TEA021390	CSA032124
CSS0000336	TEA024897	NA
CSS0000337	TEA012576	CSA030434
CSS0000339	TEA023394	CSA010847
CSS0000342	TEA007990	CSA004679
CSS0000343	TEA023108	CSA027319
CSS0000344	NA	CSA028110
CSS0000345	TEA016510	NA
CSS0000346	TEA003899	CSA016910
CSS0000347	NA	CSA026302
CSS0000348	TEA032199	CSA005610
CSS0000349	TEA015317	CSA014431
CSS0000350	NA	CSA013916
CSS0000352	NA	CSA000432
CSS0000353	TEA029506	NA
CSS0000355	TEA011790	CSA020006
CSS0000356	NA	CSA012463
CSS0000357	TEA011785	CSA014551
CSS0000358	NA	CSA001180
CSS0000359	TEA029983	NA
CSS0000360	NA	CSA017325
CSS0000362	NA	CSA009848
CSS0000365	NA	CSA036329
CSS0000366	TEA032758	NA
CSS0000367	NA	CSA033569
CSS0000368	TEA024768	NA
CSS0000369	NA	CSA011556
CSS0000372	NA	CSA006367
CSS0000373	TEA032005	CSA008201
CSS0000374	TEA002556	NA
CSS0000375	TEA017211	CSA004735
CSS0000376	TEA028080	NA
CSS0000377	NA	CSA008086
CSS0000378	TEA006009	CSA018179
CSS0000379	NA	CSA015742
CSS0000380	TEA004179	CSA001981
CSS0000382	TEA015707	CSA001779
CSS0000383	NA	CSA013077
CSS0000384	TEA028836	CSA006793
CSS0000385	TEA027447	CSA033772
CSS0000386	NA	CSA028443
CSS0000387	TEA011692	CSA032708
CSS0000388	NA	CSA012881
CSS0000389	TEA016979	CSA020222
CSS0000390	NA	CSA022392
CSS0000392	NA	CSA021484
CSS0000396	TEA022814	NA
CSS0000397	NA	CSA033529
CSS0000398	TEA032310	NA
CSS0000400	NA	CSA015208
CSS0000404	TEA009681	NA
CSS0000406	NA	CSA001327
CSS0000407	TEA013792	CSA009904
CSS0000408	TEA033616	NA
CSS0000409	TEA005762	CSA026740
CSS0000414	NA	CSA000058
CSS0000415	TEA028131	CSA006489
CSS0000416	NA	CSA019764
CSS0000418	TEA011953	CSA022453
CSS0000420	TEA021610	CSA034139
CSS0000422	NA	CSA035329
CSS0000424	NA	CSA003263
CSS0000426	NA	CSA007820
CSS0000427	TEA001802	CSA027921
CSS0000430	TEA013247	CSA010649
CSS0000431	TEA011171	CSA009458
CSS0000432	TEA009001	NA
CSS0000433	NA	CSA030676
CSS0000434	TEA014051	NA
CSS0000436	TEA023235	CSA005263
CSS0000438	TEA024134	CSA024657
CSS0000439	TEA011665	CSA002310
CSS0000440	TEA025518	CSA001701
CSS0000441	NA	CSA009832
CSS0000442	TEA031815	NA
CSS0000443	TEA032646	CSA030667
CSS0000444	TEA022376	CSA003968
CSS0000445	TEA010558	CSA013614
CSS0000446	NA	CSA026587
CSS0000447	NA	CSA034136
CSS0000448	NA	CSA022221
CSS0000449	TEA010537	NA
CSS0000450	NA	CSA029238
CSS0000451	NA	CSA007631
CSS0000452	TEA031834	CSA020392
CSS0000453	TEA028557	CSA005173
CSS0000455	NA	CSA021168
CSS0000456	NA	CSA026360
CSS0000457	TEA019703	CSA030782
CSS0000458	TEA027750	NA
CSS0000460	TEA032507	CSA011125
CSS0000462	TEA030683	NA
CSS0000464	TEA031651	NA
CSS0000465	TEA033160	NA
CSS0000466	NA	CSA028226
CSS0000467	NA	CSA027489
CSS0000469	NA	CSA008196
CSS0000472	TEA029369	CSA007008
CSS0000473	TEA003117	CSA021748
CSS0000474	TEA016149	CSA022627
CSS0000476	TEA005620	CSA025481
CSS0000478	TEA009721	NA
CSS0000479	NA	CSA029163
CSS0000480	NA	CSA016223
CSS0000482	TEA029162	CSA031380
CSS0000483	NA	CSA025792
CSS0000484	NA	CSA007147
CSS0000486	TEA024192	NA
CSS0000487	NA	CSA025478
CSS0000488	NA	CSA017137
CSS0000489	NA	CSA002109
CSS0000490	NA	CSA009019
CSS0000491	TEA021417	NA
CSS0000492	TEA033176	CSA032321
CSS0000495	NA	CSA014212
CSS0000499	NA	CSA024543
CSS0000500	TEA031699	NA
CSS0000502	TEA013519	NA
CSS0000506	TEA025560	CSA024903
CSS0000507	TEA009776	NA
CSS0000508	TEA014449	NA
CSS0000511	NA	CSA028577
CSS0000513	TEA028652	CSA008793
CSS0000514	NA	CSA011909
CSS0000516	TEA001339	NA
CSS0000517	TEA021819	CSA018884
CSS0000518	NA	CSA013989
CSS0000524	NA	CSA017245
CSS0000525	TEA010573	NA
CSS0000526	NA	CSA031670
CSS0000527	NA	CSA003171
CSS0000528	TEA031421	CSA024137
CSS0000532	TEA006088	CSA011275
CSS0000533	TEA012206	CSA006909
CSS0000534	TEA026695	NA
CSS0000535	TEA000341	CSA031574
CSS0000536	NA	CSA002729
CSS0000538	TEA003549	CSA019253
CSS0000539	NA	CSA014499
CSS0000540	NA	CSA029171
CSS0000541	NA	CSA025431
CSS0000543	TEA004627	CSA026074
CSS0000546	TEA000937	CSA018135
CSS0000547	TEA002198	CSA016316
CSS0000549	TEA033596	CSA003109
CSS0000550	NA	CSA025277
CSS0000554	TEA002856	NA
CSS0000555	TEA016222	NA
CSS0000556	NA	CSA004940
CSS0000558	TEA003545	NA
CSS0000559	NA	CSA015824
CSS0000560	NA	CSA017628
CSS0000561	NA	CSA029151
CSS0000562	TEA032607	CSA000129
CSS0000563	NA	CSA017736
CSS0000565	TEA030215	CSA018836
CSS0000566	NA	CSA019841
CSS0000568	TEA012041	NA
CSS0000570	NA	CSA007158
CSS0000571	NA	CSA028251
CSS0000574	TEA000270	CSA032437
CSS0000575	TEA013896	CSA014227
CSS0000577	NA	CSA024163
CSS0000579	NA	CSA016293
CSS0000580	TEA033372	CSA026211
CSS0000582	TEA002121	CSA012763
CSS0000586	TEA003112	CSA025167
CSS0000587	TEA013206	NA
CSS0000589	NA	CSA034238
CSS0000591	NA	CSA009908
CSS0000594	NA	CSA028911
CSS0000599	TEA014871	CSA010685
CSS0000600	NA	CSA035518
CSS0000601	TEA013439	CSA030470
CSS0000602	TEA017189	CSA024146
CSS0000603	NA	CSA034746
CSS0000604	NA	CSA019910
CSS0000605	NA	CSA028514
CSS0000606	TEA028425	CSA015671
CSS0000608	NA	CSA008307
CSS0000609	TEA022039	NA
CSS0000610	TEA029114	CSA015449
CSS0000612	NA	CSA026865
CSS0000613	TEA001346	CSA021607
CSS0000614	TEA004965	NA
CSS0000618	TEA018334	NA
CSS0000621	NA	CSA021288
CSS0000623	TEA012412	CSA019810
CSS0000624	TEA016747	CSA026352
CSS0000627	NA	CSA023696
CSS0000629	TEA025879	CSA027253
CSS0000631	NA	CSA018553
CSS0000632	NA	CSA035513
CSS0000633	NA	CSA005781
CSS0000634	TEA032140	CSA013132
CSS0000636	TEA002321	CSA010638
CSS0000639	TEA026888	CSA012949
CSS0000640	TEA023536	CSA032669
CSS0000641	TEA029636	NA
CSS0000644	NA	CSA020693
CSS0000645	TEA027168	CSA022929
CSS0000647	TEA008270	CSA028954
CSS0000649	TEA014672	CSA024566
CSS0000651	TEA020948	CSA024273
CSS0000653	TEA015861	CSA006035
CSS0000655	TEA007471	CSA013228
CSS0000657	TEA017404	CSA008213
CSS0000659	TEA007559	CSA013743
CSS0000661	NA	CSA002178
CSS0000662	TEA033764	CSA007991
CSS0000663	TEA030942	NA
CSS0000664	TEA020464	CSA033249
CSS0000665	TEA004521	NA
CSS0000666	TEA001069	CSA001598
CSS0000667	NA	CSA034759
CSS0000672	TEA032730	NA
CSS0000673	TEA022316	CSA034245
CSS0000674	NA	CSA029659
CSS0000675	NA	CSA001661
CSS0000676	TEA022539	CSA027457
CSS0000680	TEA031452	CSA027935
CSS0000682	TEA030328	CSA002026
CSS0000683	NA	CSA003413
CSS0000685	TEA029130	CSA034472
CSS0000686	TEA000273	NA
CSS0000687	TEA015144	CSA012744
CSS0000688	TEA030051	NA
CSS0000689	NA	CSA033916
CSS0000690	NA	CSA016168
CSS0000691	TEA021419	CSA017565
CSS0000693	TEA001184	NA
CSS0000695	TEA009550	CSA018462
CSS0000696	TEA003600	NA
CSS0000697	TEA013826	CSA001455
CSS0000698	TEA028770	CSA007971
CSS0000700	TEA001603	CSA013079
CSS0000701	TEA016822	NA
CSS0000702	TEA007392	CSA024365
CSS0000703	NA	CSA015102
CSS0000704	TEA006757	NA
CSS0000705	TEA015830	CSA034150
CSS0000706	NA	CSA006518
CSS0000707	TEA015529	CSA030441
CSS0000708	TEA009168	CSA015379
CSS0000709	NA	CSA023011
CSS0000710	TEA008863	NA
CSS0000711	TEA023505	CSA014558
CSS0000716	TEA011187	CSA025999
CSS0000717	TEA025932	CSA011648
CSS0000718	TEA025105	NA
CSS0000719	NA	CSA022673
CSS0000720	TEA025433	NA
CSS0000721	NA	CSA026856
CSS0000724	NA	CSA000927
CSS0000725	NA	CSA016533
CSS0000726	TEA033844	CSA011883
CSS0000727	TEA010564	CSA033723
CSS0000731	TEA031668	CSA011916
CSS0000732	TEA014124	CSA015432
CSS0000733	TEA028039	CSA017182
CSS0000734	TEA022523	NA
CSS0000737	TEA027001	CSA016267
CSS0000738	TEA030901	CSA002147
CSS0000739	TEA019009	CSA009317
CSS0000740	TEA033174	CSA030793
CSS0000741	TEA013833	CSA028653
CSS0000742	TEA000685	NA
CSS0000744	TEA022796	CSA026688
CSS0000745	TEA022388	NA
CSS0000747	TEA017440	CSA004356
CSS0000748	TEA010401	NA
CSS0000749	NA	CSA030585
CSS0000750	NA	CSA009381
CSS0000751	TEA000081	CSA000343
CSS0000752	NA	CSA030864
CSS0000753	NA	CSA002988
CSS0000754	NA	CSA027268
CSS0000755	TEA029235	CSA032687
CSS0000756	TEA021899	NA
CSS0000759	NA	CSA018205
CSS0000760	TEA031109	CSA035058
CSS0000761	TEA000951	CSA021537
CSS0000764	NA	CSA036256
CSS0000767	TEA011435	NA
CSS0000768	TEA017453	CSA012720
CSS0000769	NA	CSA006571
CSS0000770	NA	CSA026412
CSS0000771	TEA014384	CSA033166
CSS0000774	TEA003823	CSA031274
CSS0000775	TEA032489	CSA002612
CSS0000776	TEA009738	CSA025835
CSS0000777	TEA016536	CSA000969
CSS0000778	TEA023436	NA
CSS0000779	NA	CSA023837
CSS0000780	TEA008259	NA
CSS0000782	TEA011506	CSA005825
CSS0000785	TEA030825	NA
CSS0000786	TEA030582	NA
CSS0000787	NA	CSA018009
CSS0000791	TEA012048	NA
CSS0000792	NA	CSA027610
CSS0000793	TEA020344	CSA020996
CSS0000794	NA	CSA017292
CSS0000795	TEA015513	NA
CSS0000796	TEA008636	CSA028485
CSS0000798	NA	CSA006521
CSS0000799	TEA012114	CSA036358
CSS0000801	TEA030774	NA
CSS0000802	NA	CSA020567
CSS0000804	TEA012770	CSA014748
CSS0000805	TEA015843	CSA003908
CSS0000806	TEA019162	CSA028390
CSS0000807	NA	CSA000803
CSS0000808	TEA019141	CSA009191
CSS0000810	TEA003292	NA
CSS0000811	NA	CSA019633
CSS0000813	NA	CSA031427
CSS0000814	TEA027871	NA
CSS0000819	TEA030222	NA
CSS0000821	NA	CSA011706
CSS0000822	NA	CSA022624
CSS0000823	TEA024954	NA
CSS0000824	TEA011968	CSA019449
CSS0000825	NA	CSA014568
CSS0000826	TEA013002	CSA014536
CSS0000827	NA	CSA003833
CSS0000828	TEA006500	CSA004982
CSS0000829	NA	CSA008670
CSS0000830	TEA005812	NA
CSS0000831	TEA025523	NA
CSS0000832	TEA011534	CSA024455
CSS0000833	TEA007791	CSA002984
CSS0000834	TEA010135	CSA011739
CSS0000835	TEA027182	CSA032432
CSS0000837	TEA010658	CSA030525
CSS0000838	NA	CSA009432
CSS0000840	NA	CSA009509
CSS0000842	TEA027799	CSA005356
CSS0000844	TEA001207	NA
CSS0000845	NA	CSA036766
CSS0000846	TEA021457	CSA026751
CSS0000847	TEA022375	CSA029122
CSS0000848	TEA009462	NA
CSS0000849	TEA018862	CSA002010
CSS0000850	TEA002379	CSA025055
CSS0000852	NA	CSA010374
CSS0000854	TEA005650	CSA002667
CSS0000860	TEA007814	CSA006250
CSS0000861	TEA001168	CSA033696
CSS0000862	NA	CSA030376
CSS0000863	NA	CSA031210
CSS0000864	NA	CSA013994
CSS0000867	TEA005487	CSA027280
CSS0000868	TEA014228	CSA028267
CSS0000870	NA	CSA011384
CSS0000871	TEA029026	NA
CSS0000875	NA	CSA028679
CSS0000876	TEA002094	NA
CSS0000878	NA	CSA007391
CSS0000879	TEA009889	CSA016191
CSS0000881	TEA007147	CSA021249
CSS0000882	TEA000303	CSA002779
CSS0000884	NA	CSA015452
CSS0000885	TEA023158	CSA007912
CSS0000886	TEA006930	CSA029920
CSS0000887	NA	CSA018123
CSS0000888	TEA029096	CSA036715
CSS0000889	TEA016585	CSA024297
CSS0000892	NA	CSA008619
CSS0000893	TEA007963	CSA011532
CSS0000894	NA	CSA019290
CSS0000896	TEA007353	CSA016325
CSS0000897	TEA034014	CSA033304
CSS0000901	TEA027555	NA
CSS0000902	TEA001582	CSA009341
CSS0000905	NA	CSA024092
CSS0000908	TEA012884	CSA023770
CSS0000909	NA	CSA011627
CSS0000910	TEA008281	CSA034319
CSS0000911	TEA028020	CSA003598
CSS0000912	NA	CSA033405
CSS0000913	TEA011965	CSA026181
CSS0000915	TEA006125	CSA016535
CSS0000916	TEA024984	CSA030294
CSS0000917	TEA009372	NA
CSS0000918	TEA002824	CSA024687
CSS0000919	TEA032483	CSA020028
CSS0000920	TEA015243	NA
CSS0000921	TEA016816	NA
CSS0000923	NA	CSA003856
CSS0000924	NA	CSA036592
CSS0000925	NA	CSA025172
CSS0000926	TEA019656	NA
CSS0000928	NA	CSA013882
CSS0000929	TEA009980	CSA018438
CSS0000930	TEA024940	NA
CSS0000931	TEA029190	CSA009534
CSS0000934	TEA027558	CSA012307
CSS0000935	TEA013427	NA
CSS0000936	TEA015118	NA
CSS0000937	TEA016311	CSA015886
CSS0000938	TEA017323	NA
CSS0000941	TEA024295	NA
CSS0000942	NA	CSA000445
CSS0000943	NA	CSA021587
CSS0000944	NA	CSA030990
CSS0000946	TEA008317	CSA012363
CSS0000947	NA	CSA021991
CSS0000948	NA	CSA003828
CSS0000950	NA	CSA006315
CSS0000951	NA	CSA020326
CSS0000952	TEA014789	NA
CSS0000953	NA	CSA034914
CSS0000954	TEA020568	CSA004921
CSS0000956	TEA030819	CSA005090
CSS0000957	TEA020176	NA
CSS0000960	NA	CSA030819
CSS0000961	NA	CSA005865
CSS0000962	TEA027187	CSA003239
CSS0000964	TEA012348	NA
CSS0000965	TEA030520	CSA032658
CSS0000966	NA	CSA006389
CSS0000968	TEA000582	CSA028838
CSS0000971	NA	CSA030365
CSS0000973	TEA025750	NA
CSS0000977	NA	CSA006609
CSS0000978	TEA021134	CSA015877
CSS0000979	TEA028475	NA
CSS0000981	NA	CSA008488
CSS0000982	TEA013509	CSA030326
CSS0000984	NA	CSA029648
CSS0000985	TEA008430	CSA004721
CSS0000989	NA	CSA019426
CSS0000990	NA	CSA028328
CSS0000991	TEA016562	CSA003628
CSS0000992	TEA015301	CSA027591
CSS0000995	NA	CSA020791
CSS0000996	NA	CSA022965
CSS0000998	TEA008844	NA
CSS0000999	TEA020997	CSA028772
CSS0001000	TEA029527	CSA018167
CSS0001003	NA	CSA015943
CSS0001005	TEA033888	CSA025347
CSS0001007	TEA008241	CSA030897
CSS0001008	TEA020081	NA
CSS0001010	TEA010771	NA
CSS0001012	TEA001305	NA
CSS0001014	TEA010415	CSA003329
CSS0001016	NA	CSA018010
CSS0001017	TEA012518	NA
CSS0001018	TEA001314	CSA016858
CSS0001019	TEA031884	NA
CSS0001021	TEA027689	CSA007294
CSS0001022	TEA024044	CSA035605
CSS0001030	NA	CSA008098
CSS0001033	TEA028739	NA
CSS0001034	TEA030640	CSA036184
CSS0001036	TEA001223	NA
CSS0001037	TEA015344	CSA007592
CSS0001038	TEA010063	CSA026817
CSS0001042	NA	CSA026648
CSS0001043	NA	CSA029635
CSS0001044	NA	CSA005085
CSS0001045	TEA000364	CSA020284
CSS0001046	TEA022966	NA
CSS0001047	NA	CSA008467
CSS0001048	NA	CSA033565
CSS0001050	NA	CSA010417
CSS0001051	TEA030403	NA
CSS0001052	TEA014359	NA
CSS0001054	TEA019715	CSA017326
CSS0001055	TEA026220	NA
CSS0001057	NA	CSA001415
CSS0001058	TEA006716	CSA035315
CSS0001059	TEA031524	CSA033561
CSS0001061	NA	CSA035826
CSS0001062	TEA018489	CSA020566
CSS0001064	TEA023698	CSA032678
CSS0001065	TEA003118	NA
CSS0001066	TEA008021	NA
CSS0001067	TEA016142	NA
CSS0001068	TEA008121	NA
CSS0001070	TEA029826	CSA030855
CSS0001071	NA	CSA001101
CSS0001073	TEA001976	NA
CSS0001076	TEA014807	CSA001380
CSS0001078	TEA021818	NA
CSS0001079	TEA026994	CSA019008
CSS0001080	TEA016356	CSA031098
CSS0001081	TEA031606	CSA028730
CSS0001082	NA	CSA016309
CSS0001083	TEA026344	NA
CSS0001084	TEA029003	CSA005101
CSS0001085	TEA018756	CSA022696
CSS0001087	TEA031339	NA
CSS0001088	NA	CSA025981
CSS0001089	TEA019923	NA
CSS0001091	NA	CSA012377
CSS0001096	TEA000184	CSA030454
CSS0001097	TEA000089	CSA021325
CSS0001100	NA	CSA001161
CSS0001101	TEA032328	CSA012244
CSS0001102	TEA025664	NA
CSS0001103	TEA026969	NA
CSS0001104	TEA027322	CSA008532
CSS0001106	TEA008726	NA
CSS0001107	TEA006804	NA
CSS0001108	TEA010708	CSA000544
CSS0001109	TEA005970	CSA000415
CSS0001110	NA	CSA026527
CSS0001116	NA	CSA003810
CSS0001118	TEA003970	NA
CSS0001119	TEA014117	NA
CSS0001120	TEA015914	CSA024416
CSS0001123	TEA011807	NA
CSS0001125	NA	CSA023887
CSS0001128	NA	CSA030034
CSS0001129	NA	CSA036339
CSS0001130	TEA016964	CSA022174
CSS0001131	TEA022044	CSA015507
CSS0001132	TEA008599	CSA027118
CSS0001133	TEA022673	NA
CSS0001134	NA	CSA022944
CSS0001135	TEA006233	CSA015317
CSS0001136	NA	CSA025846
CSS0001137	TEA022859	NA
CSS0001138	TEA016937	CSA001615
CSS0001142	TEA019368	CSA017226
CSS0001144	TEA027725	NA
CSS0001145	NA	CSA001499
CSS0001147	TEA025971	CSA021097
CSS0001148	NA	CSA031391
CSS0001149	TEA031572	CSA027646
CSS0001153	TEA005372	CSA031697
CSS0001154	TEA027075	CSA014125
CSS0001157	NA	CSA032618
CSS0001158	NA	CSA008413
CSS0001160	NA	CSA034503
CSS0001161	NA	CSA004764
CSS0001162	NA	CSA006021
CSS0001165	TEA007633	CSA017046
CSS0001166	TEA000861	NA
CSS0001167	TEA025147	CSA024222
CSS0001169	NA	CSA010053
CSS0001170	TEA027777	CSA034105
CSS0001171	TEA018563	NA
CSS0001172	TEA022366	CSA008516
CSS0001173	NA	CSA035558
CSS0001175	NA	CSA001535
CSS0001176	TEA014823	CSA036892
CSS0001181	NA	CSA036411
CSS0001182	NA	CSA018700
CSS0001183	NA	CSA030842
CSS0001186	TEA015880	CSA007800
CSS0001187	TEA000514	CSA014339
CSS0001188	TEA009551	NA
CSS0001189	TEA019251	CSA010007
CSS0001191	TEA029048	NA
CSS0001192	NA	CSA005191
CSS0001193	NA	CSA006671
CSS0001194	TEA011393	CSA027109
CSS0001195	TEA003825	CSA006194
CSS0001196	NA	CSA026791
CSS0001197	TEA013824	CSA022470
CSS0001200	TEA004336	CSA011021
CSS0001201	NA	CSA024118
CSS0001203	TEA019867	CSA016138
CSS0001204	NA	CSA004878
CSS0001205	NA	CSA016365
CSS0001206	TEA021616	CSA035080
CSS0001207	TEA022275	NA
CSS0001210	TEA030547	CSA023194
CSS0001211	NA	CSA018238
CSS0001213	NA	CSA024627
CSS0001214	TEA009443	CSA002229
CSS0001215	TEA012266	CSA019134
CSS0001216	NA	CSA032116
CSS0001219	TEA004043	CSA023063
CSS0001222	TEA022730	CSA032495
CSS0001223	TEA001153	CSA003423
CSS0001226	TEA022592	NA
CSS0001227	TEA030270	NA
CSS0001230	TEA016019	NA
CSS0001233	TEA025930	CSA023604
CSS0001234	NA	CSA025856
CSS0001235	TEA032540	NA
CSS0001236	TEA033318	NA
CSS0001237	TEA024986	CSA026126
CSS0001238	NA	CSA019165
CSS0001241	TEA023127	CSA024339
CSS0001242	TEA032609	CSA016274
CSS0001243	NA	CSA017614
CSS0001245	TEA010169	NA
CSS0001246	TEA031366	NA
CSS0001248	NA	CSA031579
CSS0001249	NA	CSA014094
CSS0001253	NA	CSA029198
CSS0001255	TEA018962	CSA004305
CSS0001256	NA	CSA016889
CSS0001257	NA	CSA017060
CSS0001258	TEA027528	NA
CSS0001261	TEA024864	NA
CSS0001264	NA	CSA034664
CSS0001265	TEA033028	NA
CSS0001267	NA	CSA005644
CSS0001268	NA	CSA035240
CSS0001271	NA	CSA006067
CSS0001272	TEA008729	CSA022346
CSS0001274	TEA020094	CSA021846
CSS0001275	NA	CSA019344
CSS0001276	NA	CSA031116
CSS0001277	NA	CSA012394
CSS0001279	TEA024885	NA
CSS0001281	TEA030906	CSA033338
CSS0001284	TEA019539	NA
CSS0001285	TEA005198	NA
CSS0001286	NA	CSA005451
CSS0001287	TEA032969	CSA005979
CSS0001289	TEA013158	CSA013723
CSS0001291	TEA017376	CSA001868
CSS0001293	TEA001575	NA
CSS0001294	TEA029294	CSA028248
CSS0001295	NA	CSA003477
CSS0001296	TEA024417	NA
CSS0001297	TEA031655	CSA014063
CSS0001298	TEA012164	CSA014817
CSS0001300	TEA003419	CSA014724
CSS0001301	TEA010808	NA
CSS0001302	TEA030950	CSA000194
CSS0001303	TEA011444	NA
CSS0001304	TEA002664	CSA018684
CSS0001305	TEA018989	NA
CSS0001306	NA	CSA031836
CSS0001308	TEA012580	CSA017846
CSS0001309	NA	CSA025634
CSS0001313	TEA031490	CSA024432
CSS0001315	TEA011274	NA
CSS0001316	TEA030044	NA
CSS0001317	TEA024604	CSA007640
CSS0001318	NA	CSA023034
CSS0001319	TEA030552	NA
CSS0001320	NA	CSA014403
CSS0001321	TEA021127	NA
CSS0001322	NA	CSA036194
CSS0001323	TEA022976	NA
CSS0001324	NA	CSA012264
CSS0001325	NA	CSA035534
CSS0001326	TEA007796	CSA031044
CSS0001327	TEA023865	NA
CSS0001330	NA	CSA005297
CSS0001333	NA	CSA020634
CSS0001334	TEA025122	CSA028683
CSS0001335	TEA024082	CSA009664
CSS0001336	TEA011110	NA
CSS0001337	NA	CSA016125
CSS0001340	NA	CSA010383
CSS0001341	TEA031835	NA
CSS0001342	TEA015097	CSA022831
CSS0001345	TEA030662	NA
CSS0001349	NA	CSA004786
CSS0001350	TEA026991	CSA019016
CSS0001353	NA	CSA002182
CSS0001354	NA	CSA010243
CSS0001355	TEA011374	CSA005783
CSS0001356	TEA011132	NA
CSS0001358	TEA004998	CSA022299
CSS0001360	TEA025610	NA
CSS0001361	TEA013485	NA
CSS0001362	NA	CSA009945
CSS0001363	TEA026018	CSA009627
CSS0001368	NA	CSA014661
CSS0001369	NA	CSA024360
CSS0001371	NA	CSA010642
CSS0001372	TEA007400	CSA011215
CSS0001373	NA	CSA028372
CSS0001374	NA	CSA021353
CSS0001377	TEA010637	NA
CSS0001379	NA	CSA032370
CSS0001382	NA	CSA024430
CSS0001384	TEA001254	CSA005715
CSS0001386	NA	CSA012117
CSS0001387	TEA014821	NA
CSS0001389	TEA025589	CSA009698
CSS0001392	TEA030318	CSA008206
CSS0001393	TEA002133	CSA012762
CSS0001394	NA	CSA035768
CSS0001395	TEA026336	NA
CSS0001396	TEA020098	CSA015475
CSS0001398	NA	CSA014999
CSS0001400	TEA018046	CSA028899
CSS0001403	TEA025095	CSA002907
CSS0001404	TEA024454	CSA019675
CSS0001405	TEA007206	CSA031641
CSS0001406	NA	CSA017686
CSS0001407	TEA012173	CSA002374
CSS0001408	NA	CSA000088
CSS0001412	TEA011036	NA
CSS0001414	TEA028454	CSA023176
CSS0001415	NA	CSA025052
CSS0001419	NA	CSA007274
CSS0001423	TEA027704	CSA021621
CSS0001424	NA	CSA019340
CSS0001425	NA	CSA015413
CSS0001426	NA	CSA009154
CSS0001427	TEA008855	CSA024993
CSS0001428	TEA014475	CSA029836
CSS0001429	NA	CSA009459
CSS0001430	TEA009885	NA
CSS0001431	NA	CSA008825
CSS0001433	NA	CSA018226
CSS0001435	TEA012872	CSA012033
CSS0001436	NA	CSA024282
CSS0001437	TEA015012	CSA033144
CSS0001441	NA	CSA031606
CSS0001442	TEA034008	CSA023534
CSS0001443	TEA028100	CSA002033
CSS0001444	TEA025087	CSA027461
CSS0001445	NA	CSA004909
CSS0001446	TEA009124	CSA000258
CSS0001447	NA	CSA002521
CSS0001449	TEA015378	NA
CSS0001450	TEA003427	CSA029914
CSS0001451	TEA018930	CSA029536
CSS0001454	NA	CSA029535
CSS0001455	NA	CSA025199
CSS0001456	TEA016355	CSA018587
CSS0001457	NA	CSA027941
CSS0001458	TEA032977	CSA035557
CSS0001460	NA	CSA027094
CSS0001461	TEA006955	CSA030677
CSS0001462	NA	CSA020692
CSS0001463	TEA001487	CSA005471
CSS0001465	NA	CSA015952
CSS0001466	TEA025841	CSA013098
CSS0001467	NA	CSA017804
CSS0001469	TEA027569	CSA028259
CSS0001471	TEA032111	CSA021498
CSS0001472	NA	CSA024605
CSS0001473	TEA029531	CSA020754
CSS0001474	TEA024998	CSA023768
CSS0001476	NA	CSA027407
CSS0001477	NA	CSA000240
CSS0001478	NA	CSA011279
CSS0001479	TEA026088	CSA012815
CSS0001481	NA	CSA000354
CSS0001484	TEA019309	NA
CSS0001486	TEA002354	NA
CSS0001488	NA	CSA011733
CSS0001490	TEA007507	CSA023690
CSS0001492	TEA003449	CSA002647
CSS0001493	TEA025790	CSA005532
CSS0001496	TEA023012	CSA032548
CSS0001497	TEA017892	NA
CSS0001498	NA	CSA016518
CSS0001500	TEA021430	CSA021388
CSS0001501	TEA011125	NA
CSS0001502	TEA030584	CSA012938
CSS0001503	NA	CSA016139
CSS0001504	TEA012866	NA
CSS0001506	NA	CSA036011
CSS0001509	TEA018321	CSA002945
CSS0001510	TEA020736	CSA008571
CSS0001511	TEA006635	NA
CSS0001512	TEA027265	CSA002174
CSS0001516	TEA001984	CSA034281
CSS0001517	NA	CSA005535
CSS0001519	NA	CSA015983
CSS0001522	NA	CSA022316
CSS0001523	TEA033397	NA
CSS0001526	NA	CSA004538
CSS0001528	TEA024649	CSA036587
CSS0001529	TEA019690	CSA007767
CSS0001530	NA	CSA002860
CSS0001533	TEA008814	CSA036829
CSS0001534	NA	CSA013200
CSS0001536	TEA010290	NA
CSS0001537	TEA029702	CSA035891
CSS0001539	NA	CSA006995
CSS0001540	NA	CSA019835
CSS0001541	NA	CSA006593
CSS0001543	TEA022938	CSA028064
CSS0001544	NA	CSA014303
CSS0001546	TEA007938	CSA007370
CSS0001549	NA	CSA004908
CSS0001551	TEA020325	NA
CSS0001552	TEA007422	NA
CSS0001553	TEA017970	CSA013620
CSS0001554	TEA011190	NA
CSS0001555	NA	CSA016252
CSS0001557	TEA032816	CSA008596
CSS0001560	TEA025639	NA
CSS0001564	TEA004073	CSA021478
CSS0001565	TEA026663	CSA022337
CSS0001566	TEA024383	NA
CSS0001567	TEA005937	CSA034573
CSS0001568	TEA015776	CSA005866
CSS0001571	TEA022798	CSA036276
CSS0001572	TEA003809	CSA006577
CSS0001574	TEA012495	CSA025042
CSS0001576	NA	CSA026191
CSS0001577	TEA023542	CSA028978
CSS0001579	TEA004577	NA
CSS0001580	NA	CSA021855
CSS0001581	NA	CSA017397
CSS0001583	NA	CSA026223
CSS0001584	NA	CSA009622
CSS0001585	NA	CSA028916
CSS0001586	NA	CSA024815
CSS0001587	TEA001577	NA
CSS0001588	NA	CSA035960
CSS0001591	TEA024862	CSA028733
CSS0001595	TEA009379	CSA029384
CSS0001596	NA	CSA029531
CSS0001597	NA	CSA002740
CSS0001598	TEA017687	CSA016391
CSS0001600	TEA029928	CSA009135
CSS0001601	TEA016856	NA
CSS0001604	TEA020961	NA
CSS0001605	TEA007058	CSA010449
CSS0001606	TEA030197	NA
CSS0001610	TEA021480	CSA010651
CSS0001611	TEA028138	CSA017913
CSS0001614	NA	CSA032003
CSS0001618	NA	CSA007804
CSS0001619	NA	CSA021872
CSS0001620	NA	CSA013218
CSS0001621	TEA031959	CSA011587
CSS0001622	TEA022560	CSA027334
CSS0001623	NA	CSA000635
CSS0001625	NA	CSA012630
CSS0001626	NA	CSA031797
CSS0001627	TEA008614	CSA031351
CSS0001630	NA	CSA001176
CSS0001631	TEA019434	CSA008995
CSS0001632	TEA018419	CSA016321
CSS0001633	TEA030414	NA
CSS0001635	TEA015391	CSA013622
CSS0001636	NA	CSA022369
CSS0001637	TEA002065	CSA005501
CSS0001638	TEA018378	CSA025351
CSS0001639	NA	CSA020628
CSS0001640	TEA023130	NA
CSS0001641	TEA022031	CSA020889
CSS0001643	TEA007496	CSA003117
CSS0001644	NA	CSA030307
CSS0001648	TEA028959	NA
CSS0001649	NA	CSA016818
CSS0001651	TEA019538	CSA019993
CSS0001652	TEA012556	NA
CSS0001653	TEA002885	NA
CSS0001655	NA	CSA002515
CSS0001656	TEA017360	NA
CSS0001657	NA	CSA012885
CSS0001658	NA	CSA015179
CSS0001659	TEA020209	CSA010464
CSS0001660	NA	CSA026741
CSS0001662	TEA027463	CSA014096
CSS0001663	TEA027007	CSA004843
CSS0001667	TEA029288	NA
CSS0001668	NA	CSA017958
CSS0001669	TEA021901	CSA016738
CSS0001670	TEA012571	CSA009443
CSS0001671	NA	CSA015299
CSS0001675	TEA003631	CSA024645
CSS0001679	TEA019006	NA
CSS0001680	TEA004361	NA
CSS0001683	NA	CSA002791
CSS0001684	TEA016597	CSA024381
CSS0001685	TEA020471	NA
CSS0001687	NA	CSA011832
CSS0001689	NA	CSA020286
CSS0001690	TEA033612	NA
CSS0001693	TEA016607	NA
CSS0001694	TEA028327	CSA015624
CSS0001695	TEA027800	CSA035626
CSS0001697	NA	CSA006206
CSS0001698	TEA001317	CSA002566
CSS0001702	TEA006568	CSA008222
CSS0001703	TEA011561	CSA029479
CSS0001704	TEA014246	CSA004063
CSS0001705	TEA015091	CSA018320
CSS0001706	TEA010778	CSA014798
CSS0001707	NA	CSA014297
CSS0001709	TEA019237	NA
CSS0001710	TEA023901	NA
CSS0001712	TEA003418	CSA020635
CSS0001714	NA	CSA018201
CSS0001719	TEA005441	CSA004324
CSS0001721	NA	CSA019495
CSS0001723	NA	CSA010361
CSS0001725	TEA030668	CSA021032
CSS0001726	TEA023720	CSA022209
CSS0001727	TEA020221	CSA018618
CSS0001729	NA	CSA011265
CSS0001730	TEA010643	CSA025426
CSS0001731	NA	CSA024357
CSS0001732	NA	CSA015287
CSS0001733	TEA008248	CSA030802
CSS0001738	NA	CSA003800
CSS0001739	TEA005075	CSA029697
CSS0001740	TEA020472	CSA028455
CSS0001741	TEA001638	NA
CSS0001742	TEA001606	NA
CSS0001743	TEA015147	CSA020525
CSS0001744	TEA005508	CSA009616
CSS0001745	TEA023495	CSA012948
CSS0001746	TEA018656	CSA025932
CSS0001748	TEA022890	NA
CSS0001750	NA	CSA003163
CSS0001751	TEA034041	CSA005198
CSS0001754	TEA014151	CSA018861
CSS0001755	TEA025903	NA
CSS0001758	TEA008801	CSA009518
CSS0001759	TEA019596	CSA007201
CSS0001760	TEA004934	CSA020183
CSS0001762	NA	CSA031696
CSS0001763	TEA021067	NA
CSS0001764	TEA006789	CSA036424
CSS0001766	NA	CSA002867
CSS0001767	TEA021763	CSA023943
CSS0001769	NA	CSA022885
CSS0001771	TEA000718	NA
CSS0001772	NA	CSA022992
CSS0001774	TEA001308	NA
CSS0001777	TEA033529	CSA017496
CSS0001778	TEA005957	CSA022247
CSS0001779	TEA029169	CSA014858
CSS0001780	TEA005599	CSA017529
CSS0001781	NA	CSA034942
CSS0001782	NA	CSA010345
CSS0001783	TEA012925	NA
CSS0001785	NA	CSA006187
CSS0001787	TEA018015	CSA034617
CSS0001788	TEA008425	NA
CSS0001789	TEA018500	CSA025032
CSS0001790	TEA016897	NA
CSS0001791	TEA028832	CSA013649
CSS0001792	NA	CSA004580
CSS0001793	TEA028270	CSA028305
CSS0001794	TEA003942	NA
CSS0001795	NA	CSA009077
CSS0001796	TEA029823	NA
CSS0001798	TEA001216	NA
CSS0001799	TEA014139	NA
CSS0001800	TEA019504	CSA017366
CSS0001802	NA	CSA026826
CSS0001803	NA	CSA034235
CSS0001804	TEA013442	NA
CSS0001805	TEA029742	CSA005778
CSS0001808	NA	CSA021292
CSS0001810	TEA017844	CSA011057
CSS0001813	TEA006592	NA
CSS0001817	TEA021368	NA
CSS0001819	TEA003093	CSA026992
CSS0001821	NA	CSA022225
CSS0001823	TEA013883	CSA016472
CSS0001824	TEA018094	NA
CSS0001825	TEA007153	CSA002592
CSS0001826	TEA031704	CSA001280
CSS0001827	NA	CSA000503
CSS0001828	TEA027952	CSA025073
CSS0001830	NA	CSA001248
CSS0001832	TEA012019	CSA033549
CSS0001834	TEA033374	CSA026210
CSS0001835	NA	CSA031928
CSS0001836	TEA027607	NA
CSS0001839	TEA018165	CSA004051
CSS0001841	TEA015139	NA
CSS0001842	NA	CSA025223
CSS0001843	TEA000209	CSA030316
CSS0001844	TEA031212	CSA011569
CSS0001845	TEA029452	CSA018712
CSS0001846	NA	CSA007834
CSS0001847	NA	CSA012077
CSS0001849	NA	CSA009392
CSS0001851	NA	CSA002973
CSS0001852	TEA015624	NA
CSS0001853	TEA019901	CSA006826
CSS0001854	TEA028159	CSA014778
CSS0001856	TEA009627	CSA010079
CSS0001858	NA	CSA036860
CSS0001860	TEA021509	CSA013784
CSS0001862	TEA009481	CSA020438
CSS0001863	TEA011026	CSA032978
CSS0001864	TEA015712	CSA000326
CSS0001865	NA	CSA032081
CSS0001866	TEA025945	NA
CSS0001872	TEA013628	CSA024030
CSS0001874	NA	CSA015794
CSS0001875	NA	CSA036866
CSS0001876	NA	CSA016969
CSS0001877	TEA020898	CSA009625
CSS0001878	TEA012991	CSA030323
CSS0001880	NA	CSA007457
CSS0001881	NA	CSA033622
CSS0001882	TEA000072	NA
CSS0001883	TEA026557	CSA035764
CSS0001884	NA	CSA013636
CSS0001888	NA	CSA015327
CSS0001889	TEA009544	CSA029033
CSS0001890	TEA022307	NA
CSS0001891	TEA009494	CSA002451
CSS0001892	TEA019493	CSA018821
CSS0001895	NA	CSA000443
CSS0001896	TEA023411	CSA004449
CSS0001897	NA	CSA032113
CSS0001898	TEA014249	NA
CSS0001901	TEA020358	CSA026932
CSS0001902	NA	CSA004758
CSS0001904	TEA008639	NA
CSS0001906	TEA001129	NA
CSS0001907	NA	CSA036083
CSS0001912	TEA026740	CSA032637
CSS0001914	TEA007758	NA
CSS0001915	TEA023584	NA
CSS0001917	TEA008027	CSA002111
CSS0001919	TEA013731	CSA023148
CSS0001920	TEA033003	NA
CSS0001922	NA	CSA006774
CSS0001924	TEA005660	CSA019106
CSS0001926	NA	CSA008833
CSS0001929	TEA024480	CSA006323
CSS0001931	TEA000910	NA
CSS0001934	NA	CSA014461
CSS0001935	TEA010170	NA
CSS0001936	TEA013307	CSA008385
CSS0001937	NA	CSA033156
CSS0001939	NA	CSA026614
CSS0001940	NA	CSA021238
CSS0001943	TEA024425	NA
CSS0001946	NA	CSA018412
CSS0001947	NA	CSA027938
CSS0001949	TEA019916	CSA025771
CSS0001950	NA	CSA011065
CSS0001954	TEA014883	CSA031831
CSS0001956	NA	CSA006899
CSS0001957	TEA014414	CSA026673
CSS0001958	TEA028871	CSA020877
CSS0001959	TEA028308	CSA010086
CSS0001960	TEA033204	CSA023151
CSS0001961	TEA007375	NA
CSS0001962	TEA021741	CSA012398
CSS0001963	TEA019592	NA
CSS0001964	NA	CSA026633
CSS0001965	NA	CSA017440
CSS0001966	TEA033498	CSA025707
CSS0001967	TEA021249	CSA030599
CSS0001968	TEA016151	CSA018029
CSS0001969	NA	CSA010130
CSS0001970	TEA008630	CSA028486
CSS0001971	NA	CSA008714
CSS0001973	TEA018547	CSA005477
CSS0001974	TEA020250	NA
CSS0001975	TEA000866	NA
CSS0001976	TEA031939	NA
CSS0001978	TEA018389	CSA030592
CSS0001982	TEA032475	CSA033626
CSS0001986	TEA005435	CSA009035
CSS0001988	TEA012507	CSA012292
CSS0001989	NA	CSA016637
CSS0001990	NA	CSA006943
CSS0001992	TEA003220	CSA026995
CSS0001993	NA	CSA022647
CSS0001994	NA	CSA003842
CSS0001996	TEA031647	NA
CSS0001997	TEA009869	CSA012349
CSS0001998	TEA017191	CSA031769
CSS0001999	NA	CSA001633
CSS0002001	TEA018003	CSA019474
CSS0002003	TEA019489	CSA016812
CSS0002004	TEA020763	CSA011673
CSS0002005	TEA015384	NA
CSS0002006	TEA019602	CSA011907
CSS0002007	TEA010362	NA
CSS0002008	TEA024496	CSA001133
CSS0002009	NA	CSA032676
CSS0002010	TEA015019	CSA005986
CSS0002011	TEA028307	CSA020228
CSS0002012	TEA000873	NA
CSS0002013	TEA026308	NA
CSS0002015	NA	CSA009799
CSS0002016	NA	CSA018505
CSS0002017	NA	CSA021361
CSS0002018	TEA000610	NA
CSS0002021	TEA003384	CSA023113
CSS0002022	NA	CSA019608
CSS0002024	NA	CSA009021
CSS0002025	NA	CSA003685
CSS0002026	NA	CSA019812
CSS0002027	TEA028041	NA
CSS0002029	TEA016868	NA
CSS0002030	TEA012548	NA
CSS0002031	TEA026847	CSA023776
CSS0002034	TEA021344	CSA026697
CSS0002035	TEA019782	CSA018078
CSS0002037	NA	CSA019616
CSS0002038	NA	CSA013706
CSS0002039	TEA016416	CSA009689
CSS0002040	NA	CSA025087
CSS0002041	NA	CSA018012
CSS0002042	NA	CSA031918
CSS0002044	TEA029593	NA
CSS0002045	NA	CSA016471
CSS0002047	NA	CSA035340
CSS0002048	TEA014158	CSA034129
CSS0002049	NA	CSA004007
CSS0002054	TEA022129	CSA033105
CSS0002055	NA	CSA007580
CSS0002057	NA	CSA015304
CSS0002059	TEA006709	NA
CSS0002061	TEA022789	CSA027952
CSS0002062	TEA020808	CSA001833
CSS0002064	TEA015723	CSA001780
CSS0002065	TEA004974	NA
CSS0002066	TEA006702	CSA013602
CSS0002072	NA	CSA031413
CSS0002073	TEA001817	NA
CSS0002075	NA	CSA034227
CSS0002077	TEA027138	NA
CSS0002080	TEA026372	NA
CSS0002082	TEA025345	CSA032877
CSS0002084	TEA008756	NA
CSS0002086	NA	CSA010777
CSS0002088	TEA007548	CSA033470
CSS0002089	NA	CSA000824
CSS0002090	TEA009899	CSA021268
CSS0002091	NA	CSA001209
CSS0002093	NA	CSA020492
CSS0002094	TEA024730	CSA002200
CSS0002096	TEA020861	NA
CSS0002097	TEA028195	CSA027242
CSS0002098	NA	CSA029932
CSS0002099	TEA009232	CSA006107
CSS0002105	TEA006302	CSA033309
CSS0002108	TEA023212	CSA035045
CSS0002109	NA	CSA021932
CSS0002112	TEA028353	CSA012883
CSS0002113	NA	CSA015633
CSS0002115	TEA008006	CSA013656
CSS0002116	NA	CSA033503
CSS0002119	NA	CSA017942
CSS0002120	TEA000895	CSA028616
CSS0002121	NA	CSA024487
CSS0002122	TEA024262	CSA013608
CSS0002124	TEA019537	NA
CSS0002125	TEA025412	CSA003355
CSS0002126	TEA008435	NA
CSS0002127	TEA003191	NA
CSS0002128	TEA019322	NA
CSS0002129	TEA003133	CSA036034
CSS0002130	TEA031023	CSA017793
CSS0002132	TEA027705	CSA017722
CSS0002133	TEA007450	CSA007402
CSS0002136	TEA028653	NA
CSS0002138	TEA032183	CSA035507
CSS0002139	TEA016362	NA
CSS0002140	TEA007846	CSA030849
CSS0002141	TEA029727	CSA033497
CSS0002143	TEA027819	NA
CSS0002144	TEA031198	CSA000442
CSS0002145	TEA023429	CSA023994
CSS0002146	TEA006866	NA
CSS0002150	TEA002283	CSA012094
CSS0002151	TEA028881	CSA034378
CSS0002152	TEA033139	CSA007835
CSS0002153	NA	CSA012544
CSS0002154	TEA028801	NA
CSS0002159	TEA001419	CSA031161
CSS0002160	NA	CSA013397
CSS0002162	TEA000781	NA
CSS0002163	TEA023897	NA
CSS0002164	NA	CSA004211
CSS0002165	NA	CSA027224
CSS0002166	NA	CSA015284
CSS0002169	TEA014741	CSA032394
CSS0002170	TEA017223	NA
CSS0002171	TEA025779	NA
CSS0002173	NA	CSA033930
CSS0002174	NA	CSA022125
CSS0002175	TEA022210	CSA002484
CSS0002176	NA	CSA023201
CSS0002177	NA	CSA002663
CSS0002178	TEA027073	NA
CSS0002179	NA	CSA005722
CSS0002181	TEA008050	CSA026446
CSS0002182	TEA021148	CSA012752
CSS0002186	TEA026349	CSA020510
CSS0002187	TEA007435	CSA019059
CSS0002188	NA	CSA005006
CSS0002190	TEA028420	NA
CSS0002191	TEA030462	CSA009800
CSS0002192	NA	CSA035025
CSS0002198	TEA015235	CSA028926
CSS0002199	TEA031407	CSA018762
CSS0002200	TEA007351	CSA009831
CSS0002201	TEA009313	CSA010111
CSS0002202	NA	CSA034124
CSS0002203	NA	CSA008002
CSS0002204	TEA018839	CSA025613
CSS0002205	TEA015005	CSA033140
CSS0002207	NA	CSA036405
CSS0002208	TEA013495	CSA014897
CSS0002209	TEA006552	NA
CSS0002211	TEA022222	CSA001912
CSS0002213	NA	CSA017254
CSS0002215	TEA002383	CSA023298
CSS0002216	TEA019423	NA
CSS0002217	TEA003398	NA
CSS0002218	NA	CSA018859
CSS0002221	TEA024127	CSA031728
CSS0002222	NA	CSA023064
CSS0002223	TEA001202	CSA020335
CSS0002225	NA	CSA012805
CSS0002226	NA	CSA002446
CSS0002227	TEA023623	NA
CSS0002231	TEA012667	CSA002512
CSS0002234	TEA024799	CSA027875
CSS0002235	TEA018939	CSA033468
CSS0002236	TEA002195	CSA001246
CSS0002237	NA	CSA027894
CSS0002240	NA	CSA001041
CSS0002242	TEA017632	NA
CSS0002243	TEA001852	NA
CSS0002244	NA	CSA013541
CSS0002248	TEA009542	CSA019517
CSS0002249	TEA024089	NA
CSS0002250	TEA023471	CSA014534
CSS0002251	TEA032745	CSA002639
CSS0002252	TEA005696	NA
CSS0002256	TEA020238	NA
CSS0002258	TEA000635	CSA011589
CSS0002259	NA	CSA000496
CSS0002260	TEA012097	CSA007654
CSS0002262	NA	CSA026575
CSS0002263	TEA007689	CSA016963
CSS0002267	NA	CSA016549
CSS0002268	TEA020479	NA
CSS0002269	TEA020657	CSA016790
CSS0002272	TEA028539	CSA026941
CSS0002275	TEA025535	CSA010941
CSS0002276	TEA031543	NA
CSS0002277	NA	CSA023274
CSS0002278	TEA006407	NA
CSS0002280	NA	CSA012333
CSS0002282	TEA009527	NA
CSS0002284	NA	CSA025141
CSS0002285	TEA025592	CSA005651
CSS0002286	NA	CSA017134
CSS0002288	TEA009603	CSA029744
CSS0002289	TEA012023	CSA002579
CSS0002290	TEA019633	CSA035771
CSS0002291	TEA031531	CSA033563
CSS0002294	TEA003896	CSA016907
CSS0002296	TEA033620	NA
CSS0002297	TEA033661	CSA019475
CSS0002298	NA	CSA018621
CSS0002302	TEA019458	CSA034258
CSS0002303	TEA016847	CSA035149
CSS0002304	TEA008491	CSA013707
CSS0002305	TEA015342	CSA019625
CSS0002306	TEA026040	CSA016712
CSS0002307	NA	CSA003366
CSS0002309	NA	CSA002492
CSS0002310	TEA014608	CSA007134
CSS0002313	TEA020117	CSA021848
CSS0002314	TEA028187	CSA016475
CSS0002315	TEA008480	NA
CSS0002317	TEA017493	CSA019122
CSS0002319	TEA002068	CSA007576
CSS0002321	TEA009731	CSA018629
CSS0002323	NA	CSA010540
CSS0002325	NA	CSA036537
CSS0002327	TEA021658	NA
CSS0002328	NA	CSA022710
CSS0002330	TEA009217	CSA031829
CSS0002331	TEA000800	NA
CSS0002332	TEA015285	CSA027953
CSS0002333	NA	CSA024486
CSS0002334	TEA032272	NA
CSS0002336	TEA009913	CSA010230
CSS0002337	TEA008944	CSA005908
CSS0002338	NA	CSA013082
CSS0002339	TEA012040	CSA014909
CSS0002340	TEA018885	NA
CSS0002341	TEA026246	CSA036509
CSS0002342	NA	CSA024130
CSS0002345	TEA031284	CSA025751
CSS0002346	TEA013737	CSA023150
CSS0002348	NA	CSA025963
CSS0002349	TEA013614	CSA025119
CSS0002350	TEA013356	NA
CSS0002351	TEA001460	NA
CSS0002352	TEA020028	CSA007150
CSS0002354	NA	CSA020482
CSS0002355	TEA019689	NA
CSS0002356	TEA023478	CSA036315
CSS0002357	TEA026272	NA
CSS0002359	TEA004848	CSA010162
CSS0002360	TEA000589	CSA031752
CSS0002361	TEA032537	CSA008776
CSS0002363	TEA013483	CSA033540
CSS0002364	TEA033860	CSA022964
CSS0002365	NA	CSA025591
CSS0002366	TEA013064	NA
CSS0002367	TEA012591	CSA035466
CSS0002369	TEA022639	NA
CSS0002370	TEA017147	CSA022508
CSS0002372	TEA001526	NA
CSS0002375	TEA030724	NA
CSS0002376	TEA009676	CSA030927
CSS0002377	NA	CSA007269
CSS0002378	TEA005729	CSA036469
CSS0002379	NA	CSA026084
CSS0002380	NA	CSA009885
CSS0002382	TEA004999	CSA025897
CSS0002384	TEA023071	NA
CSS0002385	TEA008160	CSA017180
CSS0002386	TEA020504	CSA031791
CSS0002389	TEA028561	CSA008874
CSS0002390	TEA004933	CSA001603
CSS0002391	TEA007795	CSA032742
CSS0002392	TEA021721	NA
CSS0002395	TEA016422	NA
CSS0002397	NA	CSA014731
CSS0002398	NA	CSA012219
CSS0002399	NA	CSA010913
CSS0002401	TEA029852	NA
CSS0002402	TEA028292	CSA023427
CSS0002404	NA	CSA018157
CSS0002405	TEA011823	CSA020337
CSS0002406	NA	CSA017750
CSS0002408	NA	CSA026753
CSS0002409	NA	CSA017934
CSS0002410	TEA019264	NA
CSS0002413	NA	CSA029529
CSS0002417	TEA012268	CSA021469
CSS0002420	TEA016132	CSA018203
CSS0002421	TEA005918	CSA023259
CSS0002422	TEA027934	CSA009980
CSS0002424	TEA018212	NA
CSS0002425	NA	CSA014439
CSS0002426	TEA033460	CSA010064
CSS0002427	NA	CSA011482
CSS0002429	NA	CSA017690
CSS0002432	NA	CSA014491
CSS0002433	TEA005556	CSA014323
CSS0002434	NA	CSA012895
CSS0002435	TEA030689	CSA017525
CSS0002436	TEA033531	NA
CSS0002437	TEA023068	CSA023662
CSS0002438	TEA012746	CSA026876
CSS0002440	TEA015073	CSA018657
CSS0002441	TEA032790	CSA003778
CSS0002442	TEA018014	CSA007593
CSS0002443	TEA013567	NA
CSS0002447	TEA005872	CSA015079
CSS0002448	NA	CSA004573
CSS0002450	TEA003838	CSA022021
CSS0002451	NA	CSA010357
CSS0002452	TEA021859	NA
CSS0002454	TEA018627	CSA029601
CSS0002455	NA	CSA013095
CSS0002457	TEA026487	CSA034559
CSS0002458	TEA024151	NA
CSS0002459	NA	CSA018731
CSS0002465	TEA016680	NA
CSS0002467	TEA011266	CSA024247
CSS0002469	TEA005058	CSA001330
CSS0002470	TEA017750	NA
CSS0002471	TEA027423	NA
CSS0002473	NA	CSA018671
CSS0002477	TEA010681	CSA019971
CSS0002480	NA	CSA013629
CSS0002481	TEA004666	CSA006481
CSS0002483	NA	CSA029888
CSS0002484	TEA026326	CSA031674
CSS0002485	TEA015410	CSA018971
CSS0002486	NA	CSA020747
CSS0002489	TEA025165	CSA024705
CSS0002492	NA	CSA011223
CSS0002494	TEA029255	NA
CSS0002495	NA	CSA005421
CSS0002501	NA	CSA010440
CSS0002502	NA	CSA014895
CSS0002503	TEA032783	CSA012976
CSS0002505	TEA004319	CSA007161
CSS0002506	NA	CSA022101
CSS0002507	TEA021930	NA
CSS0002508	TEA031251	NA
CSS0002509	TEA019593	NA
CSS0002510	TEA025795	NA
CSS0002512	NA	CSA000687
CSS0002514	NA	CSA013462
CSS0002515	TEA025503	CSA036856
CSS0002518	TEA006553	CSA020235
CSS0002519	TEA000959	NA
CSS0002520	TEA019929	NA
CSS0002524	NA	CSA003296
CSS0002525	NA	CSA024869
CSS0002526	NA	CSA016232
CSS0002527	TEA033535	NA
CSS0002528	TEA021320	CSA018667
CSS0002529	TEA008221	NA
CSS0002532	TEA025249	CSA028656
CSS0002533	TEA024015	CSA019237
CSS0002534	TEA017457	CSA026113
CSS0002536	TEA010817	CSA016382
CSS0002538	TEA027065	NA
CSS0002539	TEA003258	CSA013703
CSS0002540	TEA028762	NA
CSS0002543	TEA034004	CSA009695
CSS0002544	NA	CSA019119
CSS0002546	NA	CSA029192
CSS0002547	TEA003371	NA
CSS0002548	TEA016181	CSA019269
CSS0002549	NA	CSA016872
CSS0002551	TEA000953	CSA021436
CSS0002552	TEA014184	CSA006772
CSS0002553	TEA025134	NA
CSS0002554	TEA026255	NA
CSS0002555	TEA019259	CSA009271
CSS0002556	TEA000531	CSA010120
CSS0002557	TEA010370	NA
CSS0002558	TEA000662	NA
CSS0002559	TEA015695	CSA023308
CSS0002560	NA	CSA018304
CSS0002561	NA	CSA032581
CSS0002562	TEA006842	NA
CSS0002564	TEA023009	NA
CSS0002565	TEA024446	CSA008767
CSS0002567	TEA017341	CSA011155
CSS0002569	TEA005523	CSA018610
CSS0002571	TEA010792	CSA014797
CSS0002573	TEA017570	CSA018031
CSS0002575	TEA008414	NA
CSS0002576	TEA017996	CSA036634
CSS0002577	TEA006700	NA
CSS0002578	TEA021502	CSA027550
CSS0002579	TEA006494	CSA009172
CSS0002580	TEA030135	CSA005541
CSS0002581	TEA020581	CSA024635
CSS0002582	TEA026660	CSA032327
CSS0002583	NA	CSA028834
CSS0002584	TEA014551	NA
CSS0002585	TEA026365	CSA006385
CSS0002586	TEA022508	NA
CSS0002588	NA	CSA019419
CSS0002589	TEA025912	CSA032372
CSS0002590	NA	CSA014455
CSS0002591	TEA003368	CSA026986
CSS0002592	TEA022115	NA
CSS0002593	NA	CSA003850
CSS0002594	TEA023268	NA
CSS0002595	TEA021469	NA
CSS0002597	TEA010825	CSA017390
CSS0002599	TEA018960	CSA021203
CSS0002600	TEA001554	NA
CSS0002601	NA	CSA026677
CSS0002604	NA	CSA021096
CSS0002605	TEA010451	CSA024848
CSS0002606	TEA005846	CSA031646
CSS0002607	TEA009007	CSA023532
CSS0002609	TEA010884	NA
CSS0002610	NA	CSA034356
CSS0002611	TEA013043	NA
CSS0002612	NA	CSA022066
CSS0002613	TEA006844	NA
CSS0002614	TEA011602	NA
CSS0002615	NA	CSA002414
CSS0002618	TEA015461	CSA014733
CSS0002623	TEA025582	CSA035412
CSS0002624	NA	CSA012891
CSS0002625	NA	CSA025381
CSS0002627	NA	CSA034760
CSS0002628	NA	CSA004880
CSS0002630	TEA027967	CSA009455
CSS0002631	TEA016444	NA
CSS0002632	TEA016877	NA
CSS0002633	NA	CSA021006
CSS0002635	TEA030705	CSA018498
CSS0002637	NA	CSA010167
CSS0002640	NA	CSA006099
CSS0002643	NA	CSA000522
CSS0002644	TEA024663	CSA010377
CSS0002645	TEA008880	CSA012204
CSS0002646	TEA002779	NA
CSS0002647	TEA000125	CSA013657
CSS0002649	TEA032312	NA
CSS0002650	TEA000892	CSA014770
CSS0002652	TEA024406	NA
CSS0002653	TEA032569	CSA000811
CSS0002656	TEA030417	NA
CSS0002658	NA	CSA013712
CSS0002660	TEA027863	CSA003266
CSS0002662	TEA023746	NA
CSS0002663	NA	CSA003543
CSS0002664	NA	CSA026889
CSS0002666	TEA008750	CSA017961
CSS0002667	TEA002057	NA
CSS0002668	TEA004204	CSA003999
CSS0002669	NA	CSA008698
CSS0002670	NA	CSA004185
CSS0002671	TEA002710	CSA004162
CSS0002672	TEA024779	CSA028853
CSS0002673	NA	CSA033768
CSS0002674	TEA014644	CSA007137
CSS0002675	NA	CSA008005
CSS0002676	NA	CSA029792
CSS0002682	TEA010624	CSA007169
CSS0002683	TEA010141	NA
CSS0002684	TEA006340	CSA030761
CSS0002686	NA	CSA031725
CSS0002688	TEA021111	CSA015289
CSS0002689	NA	CSA026409
CSS0002690	TEA025915	NA
CSS0002692	TEA005039	NA
CSS0002695	NA	CSA035324
CSS0002697	TEA005639	CSA017334
CSS0002698	TEA005684	CSA027859
CSS0002701	TEA032014	CSA014380
CSS0002702	TEA007160	CSA033889
CSS0002704	NA	CSA000645
CSS0002705	TEA014718	CSA030749
CSS0002706	TEA020748	NA
CSS0002708	TEA029919	CSA004576
CSS0002709	TEA003063	CSA033349
CSS0002710	NA	CSA003702
CSS0002711	TEA027950	CSA035615
CSS0002713	TEA021620	CSA035078
CSS0002714	TEA033067	CSA025681
CSS0002715	TEA014792	CSA030971
CSS0002716	NA	CSA005013
CSS0002717	TEA024347	NA
CSS0002719	TEA029111	CSA000279
CSS0002720	TEA021262	CSA000043
CSS0002722	NA	CSA022914
CSS0002723	TEA018669	CSA029788
CSS0002724	TEA030184	NA
CSS0002725	TEA022104	CSA002930
CSS0002726	TEA007457	CSA028726
CSS0002727	TEA018573	NA
CSS0002728	TEA012730	CSA009440
CSS0002729	TEA001043	NA
CSS0002730	NA	CSA014883
CSS0002731	NA	CSA032929
CSS0002732	TEA021905	NA
CSS0002734	NA	CSA036822
CSS0002735	NA	CSA018298
CSS0002737	TEA034001	NA
CSS0002738	TEA009457	CSA001149
CSS0002739	NA	CSA025494
CSS0002741	TEA031589	CSA003049
CSS0002743	TEA025860	CSA013100
CSS0002744	NA	CSA003642
CSS0002745	TEA017119	NA
CSS0002746	TEA020302	CSA001351
CSS0002747	NA	CSA032263
CSS0002748	TEA032409	NA
CSS0002750	TEA004157	CSA021373
CSS0002752	NA	CSA003854
CSS0002753	TEA017124	CSA016607
CSS0002757	TEA013120	CSA005885
CSS0002758	TEA004042	CSA021968
CSS0002759	TEA001508	CSA007785
CSS0002761	TEA030696	CSA019525
CSS0002763	TEA014785	NA
CSS0002767	TEA006595	CSA011377
CSS0002769	TEA032954	NA
CSS0002771	TEA029674	CSA034225
CSS0002774	TEA014692	CSA036301
CSS0002775	TEA024643	CSA030534
CSS0002776	TEA032029	NA
CSS0002779	TEA029955	CSA033181
CSS0002780	NA	CSA029056
CSS0002783	TEA005298	CSA030807
CSS0002786	NA	CSA028798
CSS0002787	NA	CSA025530
CSS0002788	TEA013018	NA
CSS0002789	NA	CSA026231
CSS0002790	NA	CSA011755
CSS0002791	NA	CSA002917
CSS0002792	TEA003457	CSA002646
CSS0002793	TEA009942	CSA012172
CSS0002794	TEA017828	CSA030946
CSS0002796	TEA029381	CSA032873
CSS0002800	TEA007080	CSA006013
CSS0002802	NA	CSA025060
CSS0002803	TEA011946	CSA027201
CSS0002805	TEA002632	CSA033122
CSS0002806	TEA024252	CSA034322
CSS0002807	TEA011633	CSA002967
CSS0002808	TEA017395	CSA001860
CSS0002809	TEA021605	CSA021117
CSS0002810	TEA016415	NA
CSS0002811	TEA007769	CSA013011
CSS0002812	TEA025955	CSA016158
CSS0002813	NA	CSA035076
CSS0002815	NA	CSA018122
CSS0002816	TEA029454	CSA014614
CSS0002819	TEA005160	CSA007439
CSS0002820	TEA017096	NA
CSS0002824	NA	CSA024946
CSS0002825	TEA032347	NA
CSS0002826	TEA024070	CSA028919
CSS0002827	NA	CSA001196
CSS0002829	TEA024381	NA
CSS0002830	TEA003674	CSA006904
CSS0002831	NA	CSA005898
CSS0002832	TEA004021	CSA032802
CSS0002833	NA	CSA026228
CSS0002834	TEA012329	CSA026566
CSS0002835	NA	CSA020795
CSS0002837	NA	CSA002570
CSS0002838	NA	CSA024149
CSS0002840	NA	CSA001950
CSS0002841	TEA021155	CSA015879
CSS0002842	NA	CSA019100
CSS0002843	NA	CSA007181
CSS0002848	TEA006906	CSA029941
CSS0002849	TEA006826	NA
CSS0002854	NA	CSA031123
CSS0002855	TEA027172	NA
CSS0002858	NA	CSA021483
CSS0002859	TEA009387	CSA032611
CSS0002860	TEA005734	CSA036473
CSS0002861	TEA000053	NA
CSS0002863	NA	CSA022638
CSS0002866	TEA012069	NA
CSS0002867	TEA001251	CSA017895
CSS0002868	TEA000542	CSA008676
CSS0002870	NA	CSA010857
CSS0002871	TEA005982	CSA012226
CSS0002872	NA	CSA031332
CSS0002873	TEA013847	CSA007089
CSS0002874	TEA005087	NA
CSS0002875	TEA003193	CSA016814
CSS0002876	TEA026395	CSA036765
CSS0002877	TEA002590	CSA012412
CSS0002880	TEA001601	CSA006090
CSS0002881	TEA025332	CSA022832
CSS0002885	NA	CSA007735
CSS0002886	TEA002937	NA
CSS0002887	NA	CSA007128
CSS0002888	TEA015135	CSA017378
CSS0002889	TEA004747	CSA004674
CSS0002890	TEA023126	CSA027669
CSS0002891	TEA004985	NA
CSS0002892	NA	CSA031145
CSS0002893	NA	CSA019564
CSS0002895	TEA013098	NA
CSS0002896	TEA028789	CSA029041
CSS0002898	TEA005865	NA
CSS0002899	NA	CSA036944
CSS0002901	TEA013365	CSA015604
CSS0002902	NA	CSA003114
CSS0002903	TEA016053	CSA011513
CSS0002904	TEA002156	CSA031452
CSS0002905	TEA025495	CSA036335
CSS0002909	NA	CSA021159
CSS0002911	NA	CSA007148
CSS0002913	TEA001255	CSA003762
CSS0002914	TEA009280	NA
CSS0002915	NA	CSA001539
CSS0002916	TEA016189	CSA036839
CSS0002918	NA	CSA030504
CSS0002919	NA	CSA024641
CSS0002920	TEA018974	CSA027446
CSS0002922	NA	CSA031688
CSS0002923	NA	CSA001268
CSS0002924	TEA031603	CSA019511
CSS0002926	TEA028958	NA
CSS0002927	TEA002368	CSA027019
CSS0002928	TEA019637	CSA018600
CSS0002929	TEA029648	CSA006998
CSS0002930	TEA013861	CSA008731
CSS0002931	TEA014791	NA
CSS0002932	TEA007537	NA
CSS0002933	TEA026600	CSA017327
CSS0002934	NA	CSA018961
CSS0002935	TEA015793	CSA033024
CSS0002936	NA	CSA008046
CSS0002937	TEA014442	NA
CSS0002939	TEA027706	NA
CSS0002943	TEA006042	NA
CSS0002944	TEA013109	CSA003441
CSS0002945	TEA004969	CSA022077
CSS0002946	TEA023457	CSA016983
CSS0002947	NA	CSA007403
CSS0002950	NA	CSA011438
CSS0002951	TEA026892	CSA016203
CSS0002953	NA	CSA000352
CSS0002955	TEA015903	CSA017384
CSS0002957	TEA033052	CSA011395
CSS0002958	TEA012203	CSA004165
CSS0002960	NA	CSA019031
CSS0002962	NA	CSA023587
CSS0002963	TEA020283	NA
CSS0002964	TEA003819	CSA010403
CSS0002966	NA	CSA004583
CSS0002967	TEA009259	CSA035630
CSS0002968	TEA022007	CSA020469
CSS0002973	NA	CSA019312
CSS0002974	NA	CSA003192
CSS0002975	NA	CSA023558
CSS0002977	NA	CSA015647
CSS0002978	TEA026001	CSA008999
CSS0002979	NA	CSA009916
CSS0002980	NA	CSA004564
CSS0002984	NA	CSA010010
CSS0002986	TEA033214	CSA035277
CSS0002987	NA	CSA000004
CSS0002990	TEA021681	NA
CSS0002991	TEA005664	NA
CSS0002992	NA	CSA035440
CSS0002993	TEA012617	CSA029368
CSS0002994	NA	CSA023825
CSS0002995	NA	CSA021226
CSS0002997	TEA014758	CSA036583
CSS0002998	NA	CSA030617
CSS0003001	NA	CSA006996
CSS0003002	NA	CSA013808
CSS0003003	TEA022999	CSA004791
CSS0003005	NA	CSA030913
CSS0003007	NA	CSA001794
CSS0003009	TEA031943	CSA030709
CSS0003010	TEA021163	CSA007886
CSS0003013	TEA034012	CSA036366
CSS0003014	TEA000370	CSA030898
CSS0003015	TEA032346	CSA015773
CSS0003016	NA	CSA002522
CSS0003017	TEA014721	CSA025662
CSS0003018	TEA007194	CSA007182
CSS0003019	TEA007404	CSA004433
CSS0003020	NA	CSA013090
CSS0003022	NA	CSA002797
CSS0003023	TEA002021	CSA002276
CSS0003024	TEA011964	CSA029042
CSS0003026	TEA008651	CSA012158
CSS0003028	TEA006071	NA
CSS0003029	TEA019244	CSA030928
CSS0003030	TEA006090	CSA009764
CSS0003031	TEA007485	CSA019957
CSS0003033	TEA024667	NA
CSS0003034	TEA004867	NA
CSS0003035	NA	CSA021392
CSS0003036	TEA013372	CSA035516
CSS0003038	NA	CSA029551
CSS0003039	NA	CSA024493
CSS0003040	TEA014242	CSA000599
CSS0003041	TEA033722	CSA029230
CSS0003042	TEA029079	CSA021494
CSS0003043	TEA015331	NA
CSS0003045	TEA031180	CSA013300
CSS0003046	NA	CSA001743
CSS0003047	TEA033836	CSA006163
CSS0003048	TEA005631	NA
CSS0003049	TEA027762	CSA024746
CSS0003050	TEA008420	NA
CSS0003051	NA	CSA015658
CSS0003053	TEA021397	CSA019230
CSS0003055	TEA022292	NA
CSS0003056	NA	CSA008148
CSS0003058	TEA018946	CSA024237
CSS0003059	TEA029061	CSA030083
CSS0003060	TEA016511	CSA000967
CSS0003061	NA	CSA034005
CSS0003062	TEA029780	NA
CSS0003064	TEA024019	CSA006720
CSS0003065	TEA002097	CSA029878
CSS0003066	TEA003268	CSA000316
CSS0003067	TEA001288	CSA020704
CSS0003068	NA	CSA031224
CSS0003069	TEA029095	CSA015437
CSS0003070	NA	CSA007313
CSS0003071	TEA025287	NA
CSS0003073	NA	CSA026934
CSS0003074	NA	CSA015477
CSS0003079	TEA018663	CSA025930
CSS0003080	NA	CSA025657
CSS0003081	NA	CSA012665
CSS0003082	TEA021547	CSA010061
CSS0003083	TEA017357	NA
[truncated: 29,782 more rows]
